# Supplementary material
Source: PubMed Central journal article supplement (PMC3426687)
Supplement: AEM.00562-12_zam999103658so1.pdf [file AEM.00562-12_zam999103658so1.pdf]

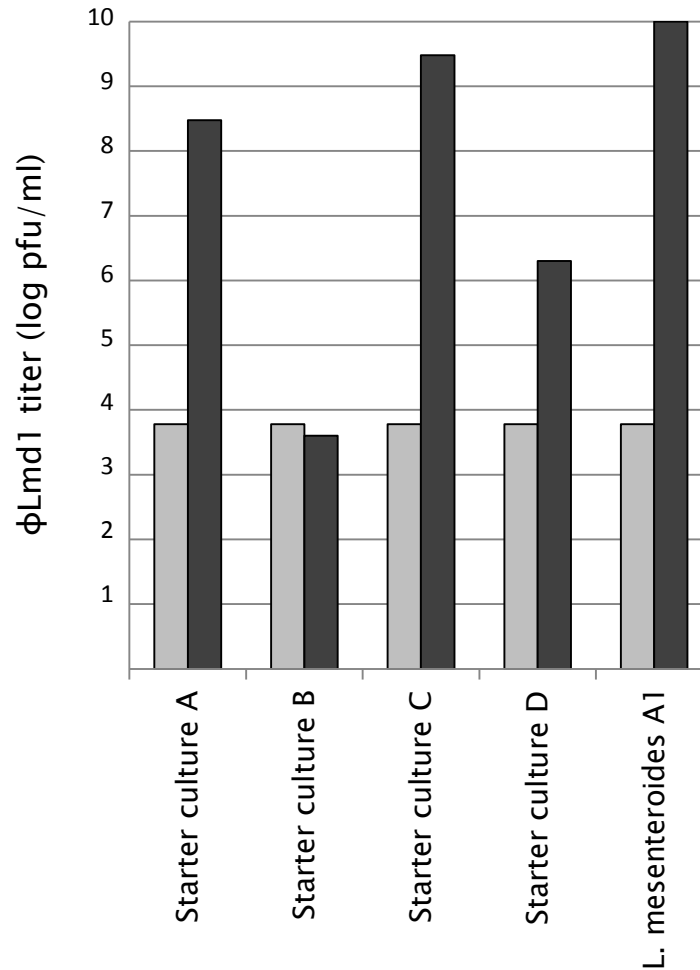

**Figure S1:**  $\phi$ Lmd1 titers before (light grey) and after (dark grey) growth on *L. mesenteroides* A1 or commercial mixed DL starter cultures A, B, C and D. *Leuconostocs* normally constitute between 1 and 10 % of mixed DL cultures.  $\phi$ Lmd1 was suspended in MRS-C and inoculated with approximately  $1 \times 10^7$  cells/ml and incubated for at least 16 hours. Starter cultures A and C were from one supplier, and B and D from another.  $\phi$ Lmd1 titers are given in plaque forming units (pfu) / ml.

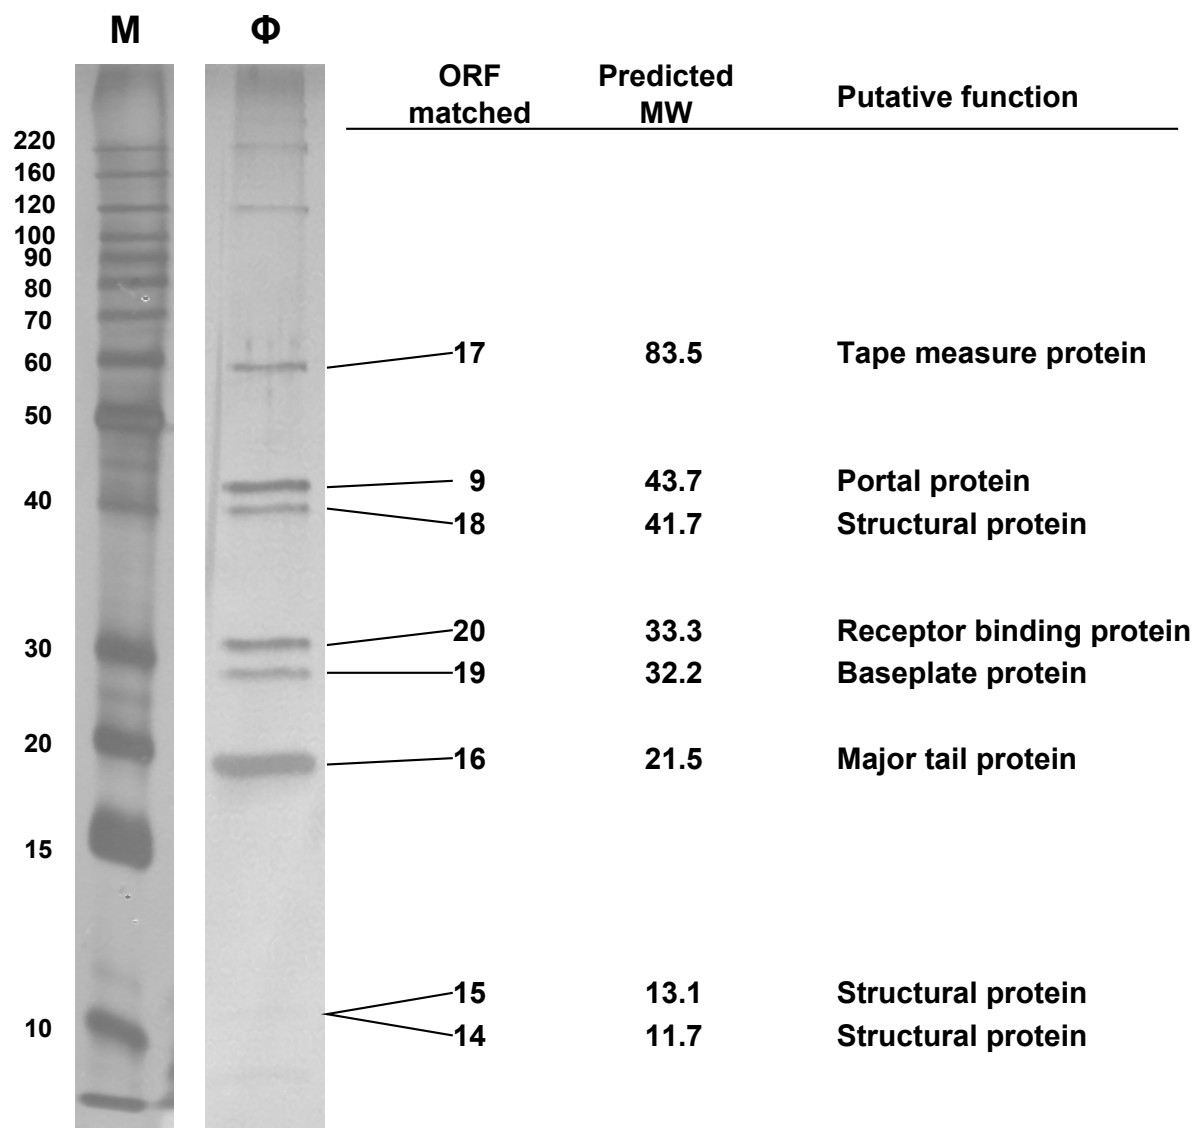

**Figure S2:** SDS-PAGE analysis and identification of  $\Phi$ Lmd1 structural proteins. Lane M shows the protein ladder with molecular masses in kilodaltons (kDa) marked on the right. Lane  $\Phi$  contains purified phage particles. Protein identities determined by MS, calculated molecular masses in kDa and putative functions are shown on the left. Phage particles were precipitated with polyethylene glycol and purified on CsCl gradients as described elsewhere (1). In-gel digestion, MALDI-TOF analysis and protein identification was performed essentially as described by Mehmeti et al. (2), except that database searches were done against the NCBI "nr" database and a local database containing all ORFs of  $\Phi$ Lmd1 larger than 50 amino acids.

Supplementary table 1: Open reading frames of  $\phi$ Lmd1 examined in this study.

| ORF | Putative ribosomal binding site and start codon sequence <sup>A</sup> | Position <sup>B</sup> |       | Size (aa) | Mol. wt. (kDa) | pI    | Putative function <sup>C</sup>   | Predicted protein                                                                   |           | Reference    |
|-----|-----------------------------------------------------------------------|-----------------------|-------|-----------|----------------|-------|----------------------------------|-------------------------------------------------------------------------------------|-----------|--------------|
|     |                                                                       | Start                 | End   |           |                |       |                                  | Closest homolog (Extent, % identities, % positives, % gaps)                         | Size (aa) |              |
| 1   | <u>TAAAGGAGGCCTAACATG</u>                                             | 2008                  | 3402  | 464       | 52.7           | 5.55  | DNA helicase                     | <i>Lactobacillus plantarum</i> , WCFS1, lp3 protein 8 (442/464, 21, 36, 11)         | 464       | NP_785924    |
| 2   | <u>ACGGAGGTGCTTTTATG</u>                                              | 3392                  | 4162  | 256       | 29.8           | 7.01  | DNA primase/polymerase           | <i>Leuconostoc</i> phage 1-A4, LM1A4_003 (250/256, 41, 58, 6)                       | 251       | ADD71726     |
| 3   | <u>CCAAGAGGTGATGATG</u>                                               | 4215                  | 4694  | 159       | 18.4           | 9.88  | HNH endonuclease                 | <i>Lactobacillus</i> phage A2, ORF57 (139/159, 40, 58, 0)                           | 207       | NP_680539    |
| 4   | <u>CGGGAGGATATACTTTG</u>                                              | 4678                  | 6495  | 605       | 68.6           | 6.17  | Possible DNA polymerase          | <i>Leuconostoc</i> phage 1-A4, LM1A4_005 (605/605, 52, 68, 1)                       | 611       | ADD71728     |
| 5   | <u>CAAGGAAGTGAACAATG</u>                                              | 6553                  | 7110  | 185       | 21.0           | 8.53  | Cons.                            | <i>Leuconostoc</i> phage 1-A4, LM1A4_006 (188/185, 46, 68, 4)                       | 190       | ADD71729     |
| 6   | <u>TAAGAGAAGATAATCATG</u>                                             | 7180                  | 7803  | 207       | 24.2           | 6.40  | Hydrolase (tRNA 3' endonuclease) | <i>Leuconostoc</i> phage 1-A4, LM1A4_007 (209/207, 62, 77, 1)                       | 210       | ADD71730     |
| 7   | <u>GAGGTAATAACCAATG</u>                                               | 7822                  | 8172  | 116       | 13.4           | 4.95  | Terminase small subunit          | <i>Leuconostoc</i> phage 1-A4, LM1A4_008 (98/116, 41, 70, 0)                        | 108       | ADD71731     |
| 8   | <u>TACGGAGAATTGAGTATG</u>                                             | 8175                  | 9815  | 546       | 62.9           | 5.50  | Terminase large subunit          | <i>Leuconostoc</i> phage 1-A4, LM1A4_010 (534/546, 56, 73, 1)                       | 548       | ADD71733     |
| 9   | <u>TTGAAAGGCATGCTATG</u>                                              | 9878                  | 11047 | 389       | 43.7           | 5.16  | Portal protein *                 | <i>Leuconostoc</i> phage 1-A4, LM1A4_011 (357/389, 52, 70, 4)                       | 373       | ADD71734     |
| 10  | <u>CAGGGAGCACGGCTAATG</u>                                             | 10998                 | 11723 | 241       | 26.0           | 4.88  | Phage prohead protease           | <i>Leuconostoc</i> phage 1-A4, LM1A4_012 (185/241, 57, 72, 4)                       | 239       | ADD71735     |
| 11  | <u>GAGGAAAATTATAATG</u>                                               | 11781                 | 12749 | 322       | 34.6           | 5.85  | Major capsid protein             | <i>Leuconostoc</i> phage 1-A4, LM1A4_013 (303/322, 49, 64, 3)                       | 321       | ADD71736     |
| 12  | <u>AAAGGAACCGACTATTATG</u>                                            | 12824                 | 13102 | 92        | 11.0           | 4.49  | Cons.                            | <i>Leuconostoc</i> phage 1-A4, LM1A4_014 (86/92, 34, 65, 0)                         | 90        | ADD71737     |
| 13  | <u>TAGGTGGTGGCAAGATG</u>                                              | 13099                 | 14047 | 315,3     | 10.5           | 9.95  | Phage tail protein               | <i>Leuconostoc</i> phage 1-A4, LM1A4_015 (70/93, 39, 51, 1)                         | 92        | ADD71738     |
| 14  | <u>AGGAGGCAATCGCTAATG</u>                                             | 13380                 | 13691 | 103       | 11.7           | 4.83  | Structural protein *             | <i>Leuconostoc</i> phage 1-A4, LM1A4_016 (105/103, 43, 66, 2)                       | 105       | ADD71739     |
| 15  | <u>AAGATGTAGTGGTCTGCTGATG</u>                                         | 13691                 | 14047 | 118       | 13.1           | 10.48 | Structural protein *             | <i>Leuconostoc</i> phage 1-A4, LM1A4_017 (114/118, 40, 54, 7)                       | 109       | ADD71740     |
| 16  | <u>ACGTGAGGATAATAAAAAATG</u>                                          | 14098                 | 14682 | 194       | 21.5           | 5.10  | Major tail protein *             | <i>Leuconostoc</i> phage 1-A4, LM1A4_018 (189/194, 63, 74, 1)                       | 193       | ADD71741     |
| 17  | <u>AAAAGGAGCTTTTAAATG</u>                                             | 14832                 | 17288 | 818       | 83.5           | 10.36 | Tape measure protein *           | <i>Leuconostoc</i> phage 1-A4, LM1A4_019 (859/818, 34, 52, 13)                      | 889       | ADD71742     |
| 18  | <u>TGATATAATCTAGTATG</u>                                              | 17332                 | 18447 | 371       | 41.7           | 4.93  | Structural protein *             | <i>Leuconostoc</i> phage 1-A4, LM1A4_020 (404/371, 28, 49, 11)                      | 398       | ADD71743     |
| 19  | <u>ATTTGGAGACTAGAGATG</u>                                             | 18450                 | 19319 | 289       | 32.2           | 5.11  | Baseplate protein *              | <i>Leuconostoc</i> phage 1-A4, LM1A4_021 (334/289, 33, 48, 14)                      | 332       | ADD71744     |
| 20  | <u>AAGAAAGGTAATAATATG</u>                                             | 19333                 | 20265 | 310       | 33.3           | 8.79  | Receptor binding tail protein *  | <i>Leuconostoc</i> phage 1-A4, LM1A4_023 (142/310, 39, 61, 5)                       | 255       | ADD71746     |
| 21  | <u>ATTGTTTAATCAATTTCTTG</u> (20286 .. 20537)                          |                       |       | 83        | 9.4            | 9.83  | Cons.                            | <i>Leuconostoc</i> phage 1-A4, position (19145..19360) (41/83, 54, 78, 0)           | 72        | GQ451696     |
| 22  | <u>AAAGGACGAACCAACATG</u> (20512 .. 20892)                            |                       |       | 126       | 14.6           | 4.78  | Cons.                            | <i>Leuconostoc</i> phage 1-A4, LM1A4_022 (114/126, 49, 67, 2)                       | 133       | ADD71745     |
| 23  | <u>AATGGAACGTAATAATG</u> (20957 .. 21340)                             |                       |       | 127       | 14.2           | 6.09  | Holin                            | <i>Leuconostoc</i> phage 1-A4, LM1A4_024 (109/127, 43, 62, 0)                       | 123       | ADD71747     |
| 24  | <u>TAGGAGATAAAAAATG</u> (21420 .. 21608)                              |                       |       | 62        | 7.0            | 7.09  |                                  | No significant similarity                                                           |           |              |
| 25  | <u>AAAGGGTGAATTTAATG</u> (21601 .. 21966)                             |                       |       | 121       | 13.2           | 4.47  |                                  | No significant similarity                                                           |           |              |
| 26  | <u>AAAGGAGAACAATAATG</u> (21966 .. 22241)                             |                       |       | 91        | 10.7           | 9.46  | Cons.                            | <i>Paenibacillus lactis</i> 154, predicted protein (87/91, 41, 57, 0)               | 106       | ZP_09002987  |
| 27  | <u>TAAGGAGCCAGAGAGATG</u> (22241 .. 22768)                            |                       |       | 175       | 20.4           | 5.19  | Cons.                            | <i>Weissella paramesenteroides</i> ATCC33313, predicted protein (68/175, 53, 71, 1) | 141       | ZP_04782166  |
| 28  | <u>AGGAGATGATATATTTG</u> (22765 .. 22983)                             |                       |       | 72        | 8.1            | 5.52  | Cons.                            | <i>Leuconostoc</i> sp. C2, LGMK_06970 (60/72, 47, 73, 0)                            | 61        | YP_004706067 |
| 29  | <u>TTAAAGGAAAATAGAATG</u> (23039 .. 23287)                            |                       |       | 82        | 9.7            | 4.66  |                                  | No significant similarity                                                           |           |              |
| 30  | <u>TGATGGAGATATATGATG</u> (23303 .. 23626)                            |                       |       | 107       | 12.6           | 4.63  | Cons.                            | <i>Leuconostoc gelidum</i> KCTC 3527, predicted protein (79/107, 41, 59, 11)        | 112       | ZP_08479517  |
| 31  | <u>GAGAGGATTTTCAAAAAATG</u> (23639 .. 23848)                          |                       |       | 69        | 8.2            | 9.42  |                                  | No significant similarity                                                           |           |              |
| 32  | <u>ACGAGGTAAATGGTATG</u> (23845 .. 23991)                             |                       |       | 48        | 6.1            | 11.41 |                                  | No significant similarity                                                           |           |              |
| 33  | <u>AAAGCGCAATTATAATG</u> (23988 .. 24257)                             |                       |       | 89        | 10.7           | 9.97  |                                  | No significant similarity                                                           |           |              |
| 34  | <u>AAAGGAGGTCACAAAAGATG</u> (24257 .. 24508)                          |                       |       | 83        | 9.7            | 9.47  |                                  | No significant similarity                                                           |           |              |
| 35  | <u>AAGAGGCAGAGCGAGTTG</u> (24620 .. 25480)                            |                       |       | 286       | 32.1           | 6.83  | Lysin                            | <i>Leuconostoc</i> sp. C2, LGMK_06825 (180/286, 83, 89, 0)                          | 319       | YP_004706038 |
| 36  | <u>GAAAGGAGGATTAACACATG</u> (25422 .. 25859)                          |                       |       | 145       | 15.5           | 7.19  | Cons.                            | <i>Leuconostoc citreum</i> KM20, LCK_01036 (132/145, 48, 65, 0)                     | 140       | YP_001728307 |
| 37  | <u>AAAGGAACGATAAGACTATG</u> (25863 .. 26009)                          |                       |       | 48        | 5.6            | 5.47  | Repressor                        | <i>Clostridium scindens</i> ATCC 35704, CLOSCI_00042 (45/48, 42, 64, 0)             | 59        | ZP_02429839  |
| 38  | <u>ATTGTGTTCAAGAAATATG</u> (435 .. 746)                               |                       |       | 103       | 12.4           | 8.88  | HNH endonuclease                 | <i>Leuconostoc</i> phage 1-A4, LM1A4_047 (90/103, 42, 58, 0)                        | 100       | ADD71770     |
| 39  | <u>AAGGGGGCTAAAAACAAAATG</u> (743 .. 1252)                            |                       |       | 169       | 18.9           | 10.08 | HNH endonuclease                 | <i>Enterococcus</i> phage EFRM31, gp11 (166/169, 45, 61, 5)                         | 173       | YP_004306639 |
| 40  | <u>GGAATGAGGTGTCACAAATG</u> (1245 .. 1571)                            |                       |       | 108       | 12.7           | 9.03  | Endonuclease                     | <i>Leuconostoc</i> phage 1-A4, LM1A4_050 (106/108, 69, 80, 1)                       | 124       | ADD71773     |

<sup>A</sup> Predicted ribosomal binding site and start codons are underlined.

<sup>B</sup> ORF positions on complement strand are shown in parentheses

<sup>C</sup> Putative function based on BLASTP and PSI-BLAST results at [www.blast.ncbi.nlm.nih.gov](http://www.blast.ncbi.nlm.nih.gov) (June 2012). Structural proteins identified in this study are indicated with an asterisk. Cons.: Conserved hypothetical protein.

## References

- Boulanger, P.** 2009. Purification of bacteriophages and SDS-PAGE analysis of phage structural proteins from ghost particles, p. 227-238. In M.R.J. Clokie and A.M. Kropinski (ed.), *Bacteriophages: Methods and Protocols, Molecular and Applied Aspects*, vol 502. Springer, New York, NY.
- Mehmeti, I., M. Jönsson, E.M. Fergestad, G. Mathisen, I.F. Nes and H. Holo.** 2011. Transcriptome, proteome and metabolite analyses of a lactate dehydrogenase-negative mutant of *Enterococcus faecalis* V583. *Appl Environ Microbiol* **77**:2406-2413
